# Supplementary material for: The Cost Effectiveness of a Tailored, Web-Based Care Program to Enhance Postoperative Recovery in Gynecologic Patients in Comparison With Usual Care: Protocol of a Stepped Wedge Cluster Randomized Controlled Trial
Source: PubMed Central journal article supplement (PMC4090379; doi:10.2196/resprot.3236), 2014-06-18
Supplement: resprot_v3i2e30_app4.pdf [file resprot_v3i2e30_app4.pdf]

Laan van Nieuw Oost-Indië 334  
2593 CE Den Haag  
Postbus 93245  
2509 AE Den Haag  
Phone +31 (0)70 349 51 11  
Fax +31 (0)70 349 51 00  
www.zonmw.nl  
info@zonmw.nl

To whom it may concern

**Filenumber**  
171102015  
**Our reference**  
2014/00856/ZONMW

**Onderwerp**  
Confirmation of grant approval

**Date**  
January 21, 2014

Dear sir, madam,

**Contact**  
Elisa Fung  
Phone +31 (0)70 349 52 60  
fung@zonmw.nl

I am writing to confirm that ZonMw has decided to approve a grant of € 439.301,- for the project entitled "*The cost-effectiveness of a transmural peri-operative care program for gynaecology*". This decision was communicated in a letter of October 20th 2010 (2010/29945/ZONMW) and is based on the positive recommendation of the committee of the "Health care efficiency research" programme.

**Assessment**

ZonMw prioritizes project proposal submissions based on scientific quality and relevance to the programme. The committee based its assessment on the quality of the project proposal, the reviewers' assessments and the project manager's response to the latter.

If this letter gives rise to any questions, please contact the individual listed in the letterhead.

Yours faithfully,



Marleen Jonker  
Programme officer
